## REFERENCES

1. Crisologo PA, Neal B, Brown R, McDanal J, Kissin I: Lidocaine-induced spinal block can relieve central poststroke pain: Role of the block in chronic pain diagnosis. *ANESTHESIOLOGY* 74: 184-185, 1991

2. Bonica J: Causalgia and other reflex sympathetic dystrophies, *The Management of Pain*. Edited by Bonica J. Philadelphia, Lea & Febiger, 1990, p 231

(Accepted for publication March 13, 1991.)

Anesthesiology  
74:1168, 1991

*In Reply:*—We disagree with Dr. Day. He puts forward two suggestions that could explain a positive response to the spinal block in central pain: systemic absorption of lidocaine and the role of the sympathetic component in the pain syndrome. Systemic absorption of lidocaine could not have been a mechanism of the pain relief in our cases because despite complete pain relief in the leg, there was no change in pain intensity in the arm after the lidocaine injection at the L2-L3 level. A sympathetic component in the mechanisms of pain also could not be a factor in our cases because we started the block procedure with an injection of 0.5% lidocaine, which caused an increase in skin temperature but no change in the pain intensity. A negative response (no pain relief) to the block is not a very useful sign in the central pain either, because even 2 ml 2% lidocaine may not block all sensory functions in the area, and those not blocked can be responsible for pain maintenance. The most important point regarding the role of the blocks in chronic pain diagnosis is that it is based on an assumption that the block distal to a lesion causing the pain cannot provide pain relief. Table 1 indicates that this may be an incorrect assumption.

IGOR KISSIN, M.D.  
JUDY MCDANAL, M.D.  
PETER A. CRISOLOGO, M.D.

Department of Anesthesiology  
University of Alabama at Birmingham  
619 South 19th Street  
Birmingham, Alabama 35233

## REFERENCES

1. Kibler RF, Nathan PW: Relief of pain and paresthesiae by nerve block distal to a lesion. *J Neurol Neurosurg Psychiatr* 23:91-98, 1960
2. Kissin I, Xavier AV, McDanal J: Blockade of sciatic nerve branches relieves sciatic radicular pain. *Anesth Analg* 69:262-263, 1989
3. Xavier AV, McDanal J, Kissin I: Relief of sciatic radicular pain by sciatic nerve block. *Anesth Analg* 67:1177-1180, 1988
4. Xavier AV, McDanal J, Kissin I: Mechanism of pain in sciatica. *Neurology* 39:601-602, 1989
5. Crisologo PA, Neal B, Brown R, McDanal J, Kissin I: Lidocaine-induced spinal block can relieve central poststroke pain: Role of the block in chronic pain diagnosis. *ANESTHESIOLOGY* 74: 184-185, 1991

(Accepted for publication March 13, 1991.)

TABLE 1. Pain Relief Following Local Anesthetic Block Distal to a Lesion

| Authors                              | Diagnosis                 | Site of Injury              | Site of Local Anesthetic Block | Result                                               |
|--------------------------------------|---------------------------|-----------------------------|--------------------------------|------------------------------------------------------|
| Kibler and Nathan <sup>1</sup>       | Central or radicular pain | Spinal roots or spinal cord | Peripheral nerves              | Relief of spontaneous pain and paresthesia           |
| Xavier <i>et al.</i> <sup>2</sup>    | Sciatica                  | Lumbar roots                | Sciatic nerve or its branches  | Relief of spontaneous pain                           |
| Kissin <i>et al.</i> <sup>3</sup>    | Sciatica                  | Lumbar roots                | Sciatic nerve                  | Prevention of pain caused by nerve-root tension test |
| Xavier <i>et al.</i> <sup>4</sup>    | Sciatica                  | Lumbar roots                | Sciatic nerve                  | Relief of spontaneous pain                           |
| Crisologo <i>et al.</i> <sup>5</sup> | Central pain              | Brain                       | Spinal cord                    | Relief of spontaneous pain                           |

Anesthesiology  
74:1168-1169, 1991

### Transfusion-induced Hyperkalemia

*To the Editor:*—Jameson *et al.*<sup>1</sup> recently reported a case of fatal hyperkalemia secondary to massive transfusion. Though the patient undoubtedly received a large load of potassium, we question the calculated rates of infusion. Specifically, the "patient received up to 420 ml/min of blood (6.43 ml · kg<sup>-1</sup> · min<sup>-1</sup>), equivalent to 9.9 mEq/min of potassium (9.1 mEq · kg<sup>-1</sup> · h<sup>-1</sup>), just prior to cardiac arrest." But, since po-

tassium values are those of plasma<sup>2</sup> and since each unit of packed red blood cells contains about 70 ml of plasma,<sup>3</sup> the calculated infusion rate of potassium is 2.3 mEq/min (2.1 mEq · kg<sup>-1</sup> · h<sup>-1</sup>) for this 5-min interval. Moreover, the patient is noted to have "received more than 2.0 mEq · kg<sup>-1</sup> · h<sup>-1</sup> during the previous 5 h." Based on the 36 units of packed cells administered during this period (each with a plasma

volume of 70 ml and a potassium level of 31.8 mEq/l—the higher of two measured prearrest values), the calculated potassium infusion rate is 0.25 mEq · kg<sup>-1</sup> · h<sup>-1</sup>.

In the studies of animals receiving potassium infusions to which the authors refer, ponies tolerated 1.78–1.99 mEq · kg<sup>-1</sup> · h<sup>-1</sup> for slightly over 1 h on the average before developing terminal dysrhythmias,<sup>4</sup> and dogs received 2.0 mEq · kg<sup>-1</sup> · h<sup>-1</sup> for 3 h prior to exhibiting “impending” ventricular fibrillation.<sup>5,6</sup> Also, Hiatt and Hiatt<sup>5</sup> found that 0.3 mm/kg rapid potassium injection produced ventricular fibrillation in dogs, and not 0.1 mm/kg, as noted in the case report.<sup>1</sup> Hence, we conclude that this patient’s hyperkalemia resulted from a potassium load that was significantly less than stated in the case report and that was not given “in rates that far exceeded rates shown to cause cardiac toxicity in humans and animals.”

KEVIN D. BUCOL, M.D.  
*Cardiothoracic Anesthesiology*

CHARLES D. SHORT, M.D.  
*Transfusion Service*

*Missouri Baptist Medical Center  
3015 North New Ballas Road  
St. Louis, Missouri 63131*

Anesthesiology  
74:1169, 1991

*In Reply:*—Hyperkalemic cardiac arrest occurs when the potassium (K<sup>+</sup>) concentration gradient between interstitial fluid and the intercellular fluid of the myocardial cell decreases until cell membrane repolarization cannot occur. *In vivo* measurements of interstitial K<sup>+</sup> concentration during hyperkalemic arrest are not available. Thus, we used whole blood sample K<sup>+</sup> concentrations to reflect this gradient. Other studies of hyperkalemic arrest due to blood transfusions used blood infusion rates to reflect K<sup>+</sup> load.<sup>1–4</sup> The K<sup>+</sup> determined expresses milliequivalents per liter of fluid tested. University of Wisconsin Hospital uses ADSOL<sup>®</sup>-preserved packed red blood cells. The absolute volume of plasma in each unit is unknown. The absolute milliequivalent infusion can only be estimated. The K<sup>+</sup> in the packed red blood cell infusion significantly elevated the serum K<sup>+</sup> (measured). This resulted in increased interstitial fluid K<sup>+</sup> and cardiac arrest. The important point of the case report is that transfusion rates can exceed the ability of the body to equilibrate and normalize serum K<sup>+</sup>. The result in this case was cardiac arrest and death. In addition, the higher the K<sup>+</sup> in these units, the greater the risk may be. Since I know of no other means to estimate the K<sup>+</sup> load during transfusion than transfusion rate and unit K<sup>+</sup> concentration, I continue to advocate vigilance when transfusion rates exceed 120 ml/min.<sup>4</sup>

LESLIE C. JAMESON, M.D.  
*Associate Professor of Anesthesia*

Anesthesiology  
74:1169–1170, 1991

## Antagonism of Vecuronium-induced Neuromuscular Block

*To the Editor:*—The study by Magorian *et al.*<sup>1</sup> “addressed the clinical problem of antagonizing a profound neuromuscular blockade” induced

- ### REFERENCES
1. Jameson LC, Popic PM, Harms BA: Hyperkalemic death during use of a high-capacity fluid warmer for massive transfusion. *ANESTHESIOLOGY* 73:1050–1052, 1990
  2. Stehling LC: Recent Advances in transfusion therapy, *Advances in Anesthesia*. Volume 4. Edited by Stoelting RK, Barash PG, Gallagher TJ. Chicago, Year Book Medical Publishers, Inc., 1987, p 242
  3. Walker RH: Technical Manual. 10th edition. Arlington, American Association of Blood Banks, 1990, p 39
  4. Glazier DB, Littledike ET, Evans RD: Electrocardiographic changes in induced hyperkalemia in ponies. *Am J Vet Res* 43: 1934–1937, 1982
  5. Hiatt N, Hiatt J: Hyperkalemia and the electrocardiogram in dogs. *Basic Res Cardiol* 83:137–140, 1988
  6. Hiatt N, Chapman LW, Davidson MB, Mack H, Sheinkopf JA: Transmembrane K transfer in hyperkalemic dogs. *Horm Metab Res* 13:386–389, 1981

(Accepted for publication March 13, 1991.)

PETER M. POPIC, M.D.  
*Assistant Professor of Anesthesia*

BRUCE A. HARMS, M.D.  
*Assistant Professor of Surgery*

*University of Wisconsin Hospital and Clinics  
600 Highland Avenue, B6/387 CSC  
Madison, Wisconsin 53792*

### REFERENCES

1. Batton DG, Batton MF, Shulman G: Serum potassium changes following packed red cell transfusion in newborn infants. *Transfusion* 23:163–164, 1983
2. Blanchette VS, Gray E, Hardie MJ, MacMurray SB, Heick HMC, Rock G: Hyperkalemia after neonatal exchange transfusion: Risk eliminated by washing red cell concentrates. *J Pediatr* 105:321–324, 1984
3. Linko K, Tigerstedt I: Hyperkalemia during massive blood transfusions. *Acta Anaesthesiol Scand* 28:220–221, 1984
4. Miller RD: *Transfusion therapy, Anesthesia*. Edited by Miller RD. New York, Churchill Livingstone, 1990, pp 1467–1499

(Accepted for publication March 13, 1991.)

by vecuronium. The authors showed statistically that recovery time was the same regardless of whether neostigmine was given during deep
